# Supplementary material for: Boosting visible-light-driven catalytic hydrogen evolution via surface Ti3+ and bulk oxygen vacancies in urchin-like hollow black TiO2 decorated with RuO2 and Pt dual cocatalysts
Source: Royal Society of Chemistry journal article supplement (doi:10.1039/d0cy01706j), 2020-01-01
Supplement: d0cy01706j1.pdf [file d0cy01706j1.pdf]

## supplementary data

### **Boosting visible-light-driven catalytic hydrogen evolution via surface $\text{Ti}^{3+}$ and bulk oxygen vacancy in urchin-like hollow black $\text{TiO}_2$ decorated with $\text{RuO}_2$ and Pt dual Co-catalyst**

Bowen Li<sup>a</sup>, Qiuye Li<sup>a,\*</sup>, Bhavana Gupta<sup>a</sup>, Chunqing He<sup>b</sup>, Jianjun Yang<sup>a,\*</sup>

<sup>a</sup>Engineering Research Center for Nanomaterials, Henan University, Kaifeng 475004, China.

<sup>b</sup>School of Physics and Technology, Wuhan University, Wuhan 430072, China

The following is Supplementary data to this article:

The SEM of sectioned  $\text{RuO}_2/\text{TiO}_2/\text{Pt-B}$  (1: 0.6) sample; The EDS-mapping of  $\text{RuO}_2/\text{TiO}_2/\text{Pt-B}$  (1: 0.6) sample; LSV curve; PL curve; BET of the as-prepared samples.

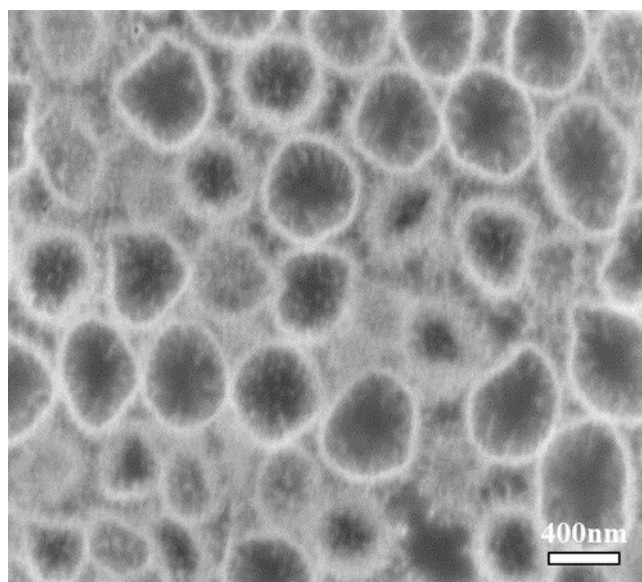

Fig S1: The SEM image of sectioned sample  $\text{RuO}_2/\text{TiO}_2/\text{Pt-B}$  (1: 0.6).

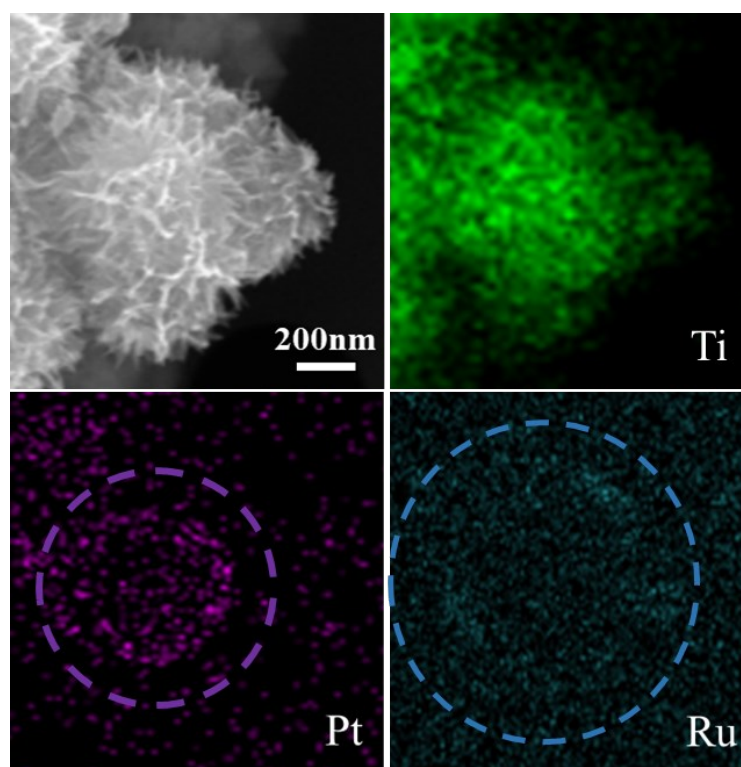

Fig S2: EDS-mapping image of the as-prepared RuO<sub>2</sub>/TiO<sub>2</sub>/Pt-B (1: 0.6) sample.

## Ruthenium • Transition Metal

Primary XPS region: Ru3d

Overlapping regions: C1s

Binding energies of common chemical states:

| Chemical state   | Binding energy Ru3d5/2 / eV |
|------------------|-----------------------------|
| Ru metal         | 280.2                       |
| RuO <sub>2</sub> | 280.7                       |

Oxide charge referenced to adventitious C1s peak at 284.8eV.

Fig S3: The Standard binding energy of the Ru metal and RuO<sub>2</sub> on the Ru3d.

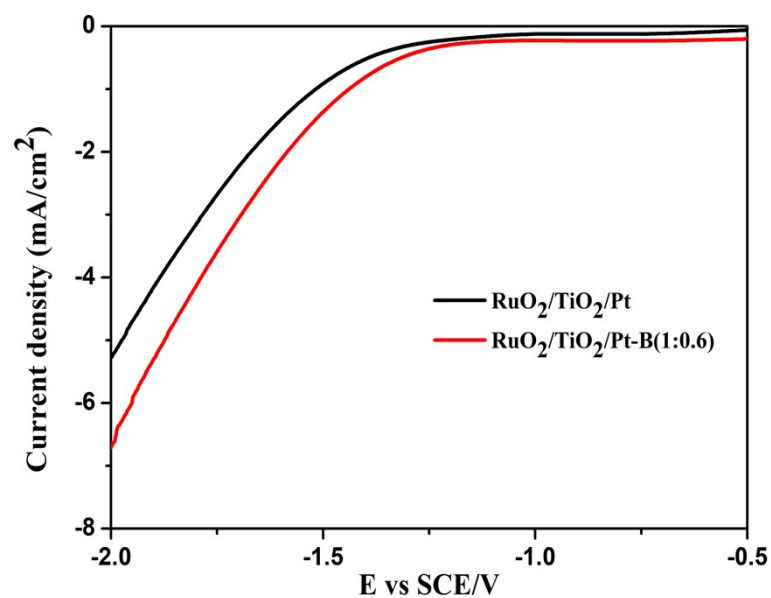

Fig S4: Linear sweep voltammetry (LSV) of the samples RuO<sub>2</sub>/TiO<sub>2</sub>/Pt and RuO<sub>2</sub>/TiO<sub>2</sub>/Pt-B (1: 0.6).

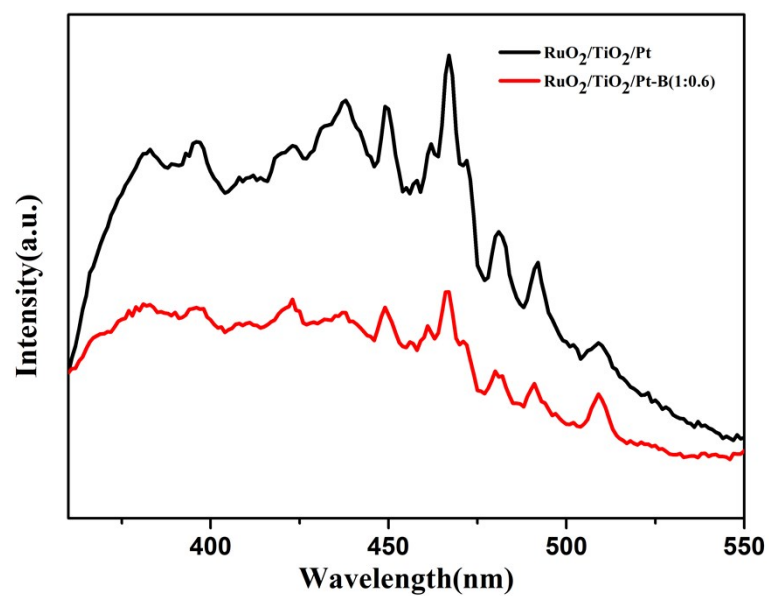

Fig S5: Photo-luminescent spectra (PL) of as-prepared samples RuO<sub>2</sub>/TiO<sub>2</sub>/Pt and RuO<sub>2</sub>/TiO<sub>2</sub>/Pt-B (1: 0.6).

Table.S1. BET of the as-prepared samples

| Sample                               | RuO <sub>2</sub> /TiO <sub>2</sub> /Pt | RuO <sub>2</sub> /TiO <sub>2</sub> /Pt-B (1: 0.6) |
|--------------------------------------|----------------------------------------|---------------------------------------------------|
| S <sub>BET</sub> (m <sup>2</sup> /g) | 140.974                                | 119.243                                           |
